# Supplementary material
Source: publisher figshare collection journal article supplement (https://frontiersin.figshare.com/ndownloader/files/21932757)
Supplement: Supplementary file 1 [file 21932757]

## *Supplementary Material*

### **Total OH reactivity changes over the Amazon rainforest during an El Niño event**

**Eva Y. Pfannerstill\***, Anke C. Nölscher, Ana M. Yáñez-Serrano, Efstratios Bourtsoukidis, Stephan Keßel, Ruud H. H. Janssen, Anywhere Tsokankunku, Stefan Wolff, Matthias Sörgel, Marta O. Sá, Alessandro Araújo, David Walter, Jošt Lavrič, Cléo Q. Dias-Júnior, Jürgen Kesselmeier, and Jonathan Williams

\* **Correspondence:** Eva Y. Pfannerstill: [eva.pfannerstill@mpic.de](mailto:eva.pfannerstill@mpic.de)

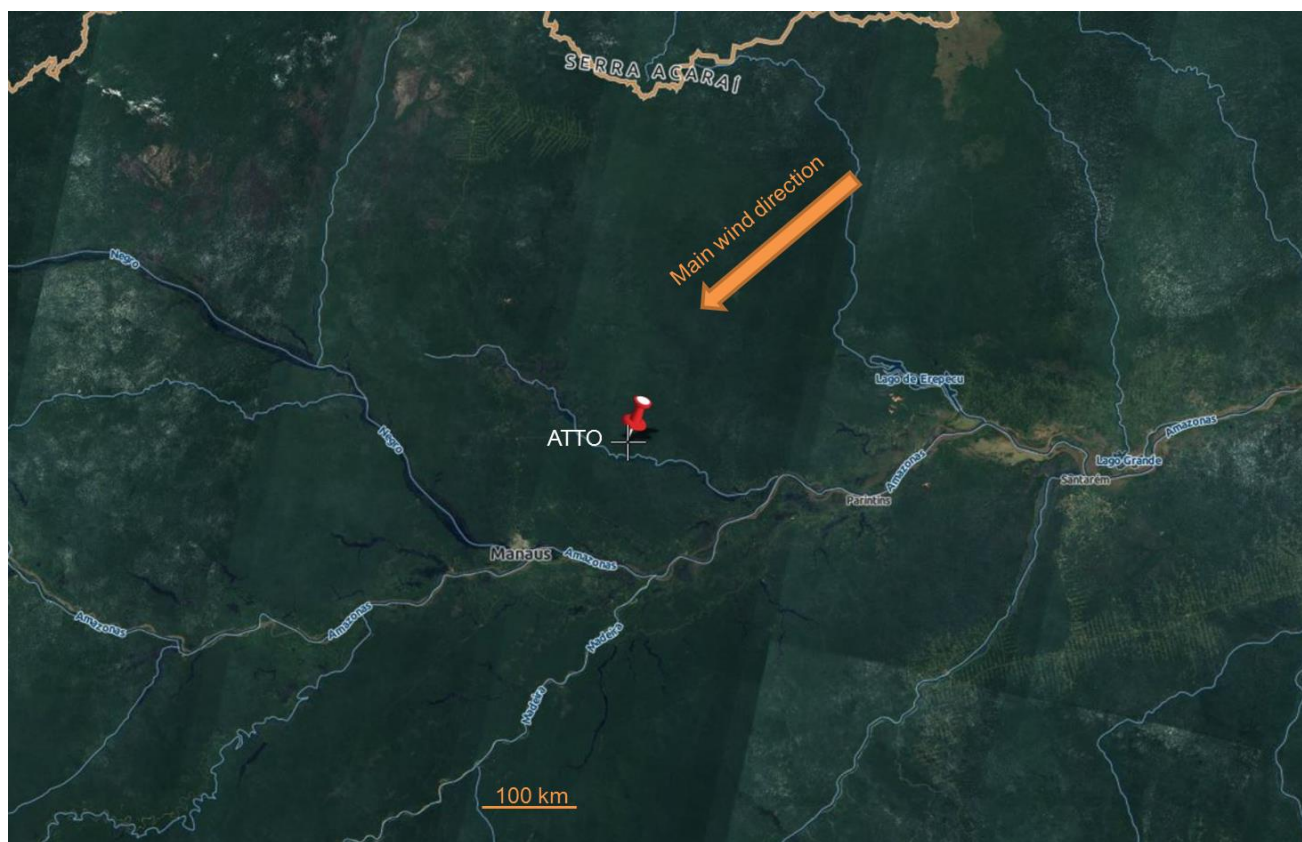

**Supplementary Figure 1.** Main wind direction and surroundings of the ATTO site. Picture: NASA (<https://worldwind.earth>).

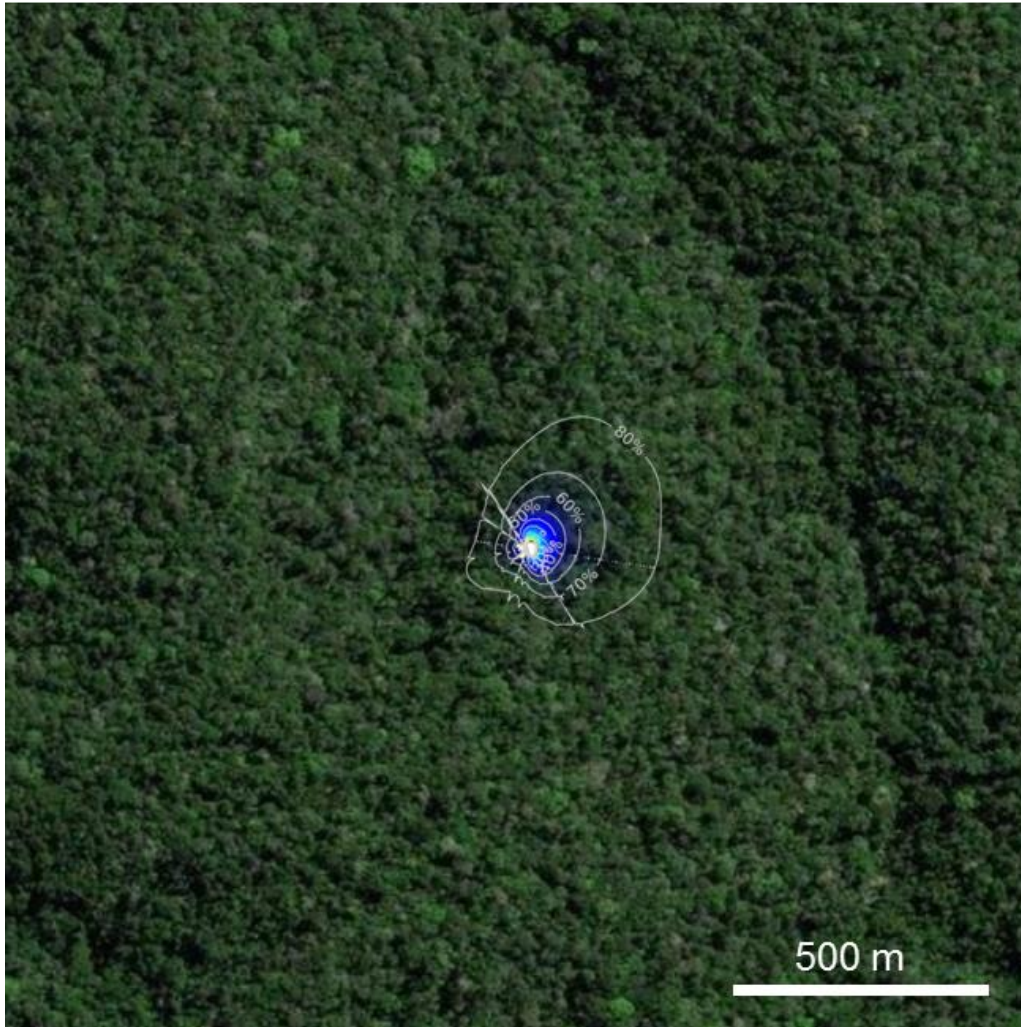

**Supplementary Figure 2.** Footprint with up to 80% origin of the fluxes measured at a displacement height of  $0.9 h = 31.5$  m at the walk-up tower. Satellite image: NASA (<https://worldwind.earth>).

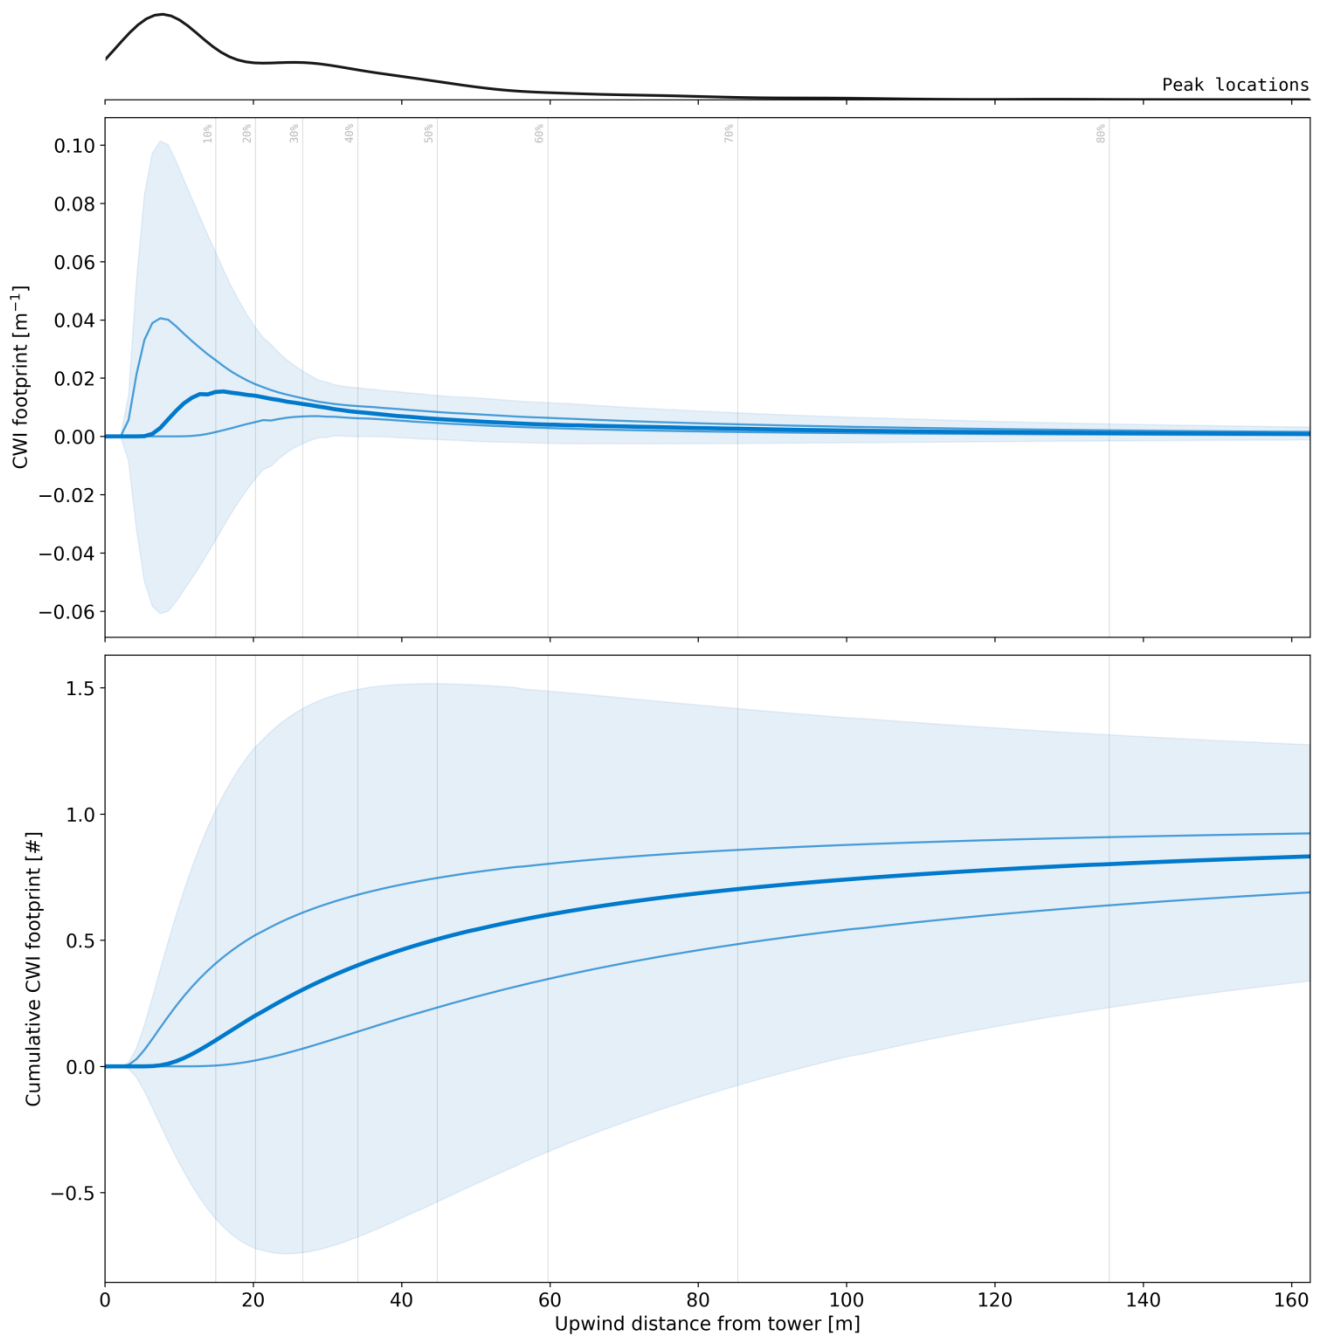

**Supplementary Figure 3.** Distance of the origin of fluxes measured at a displacement height of  $0.9 h = 31.5$  m. The light-blue lines depict the 25<sup>th</sup> to 75<sup>th</sup> percentiles and the shaded areas all data.

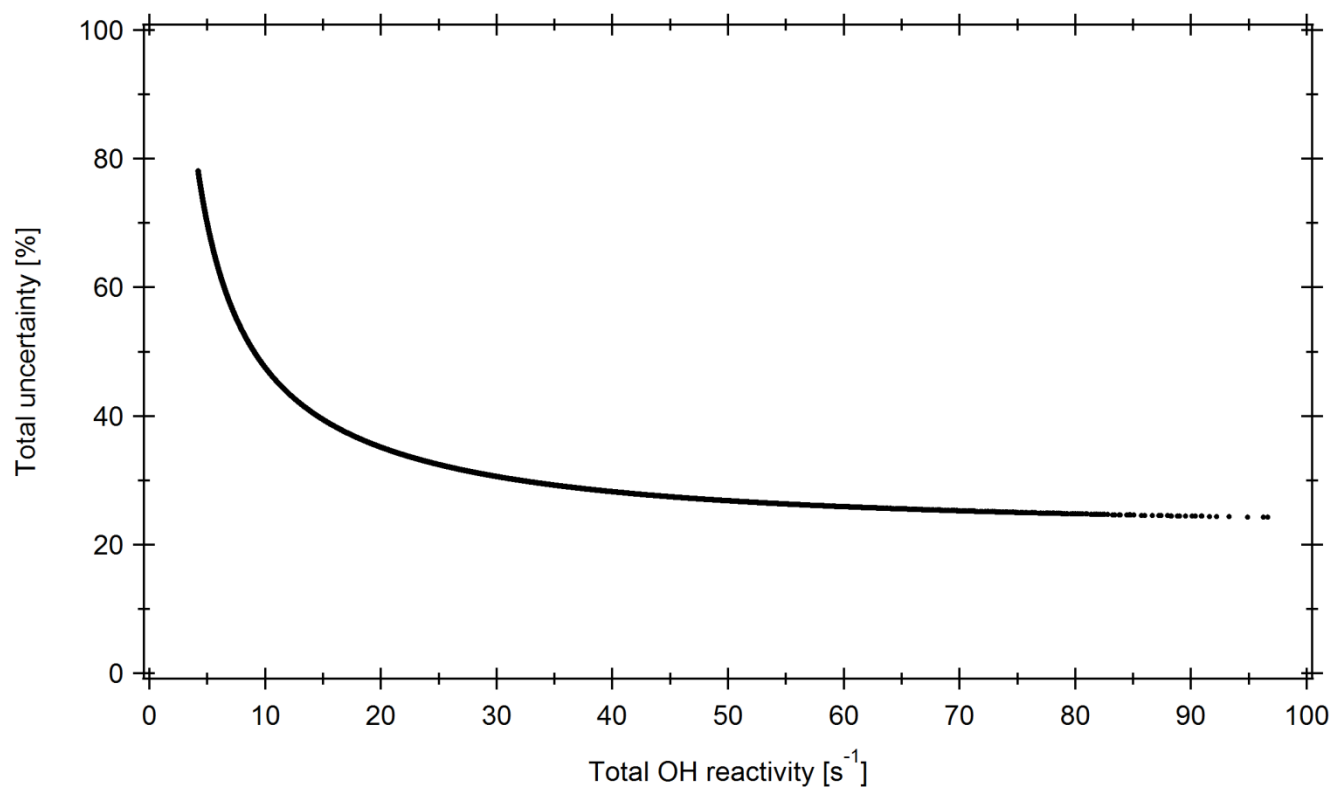

**Supplementary Figure 4.** Total uncertainty of the total OH reactivity measurement, dependent of the amount of OH reactivity.

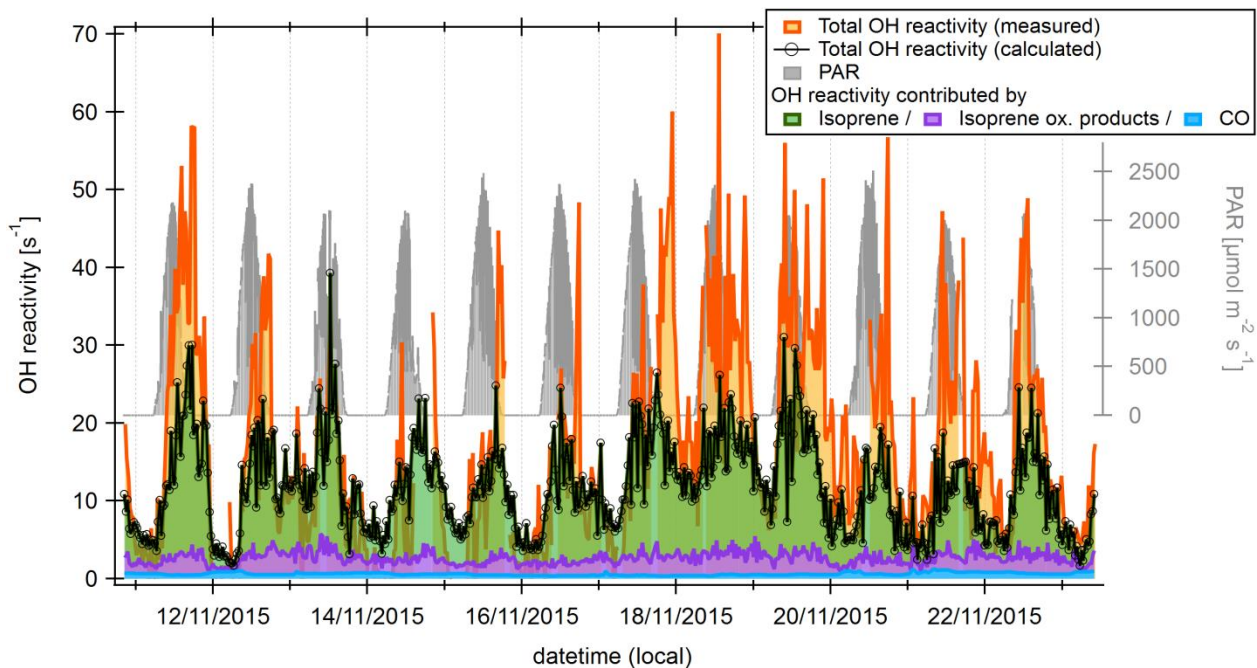

**Supplementary Figure 5.** Time series of OH reactivity measured in November 2015, and reactivity contributions calculated from measured isoprene, isoprene oxidation products ( $m/z$  71) and carbon monoxide (30 min averages, respectively). Not depicted: contributions of ozone (max.  $0.06 \text{ s}^{-1}$ ), methane (max.  $0.28 \text{ s}^{-1}$ ), NO (max.  $0.2 \text{ s}^{-1}$ ) and  $\text{NO}_2$  (max.  $0.38 \text{ s}^{-1}$ ). Gaps in reactivity data are due to calibrations. Photosynthetic active radiation (PAR) is displayed on the right axis.

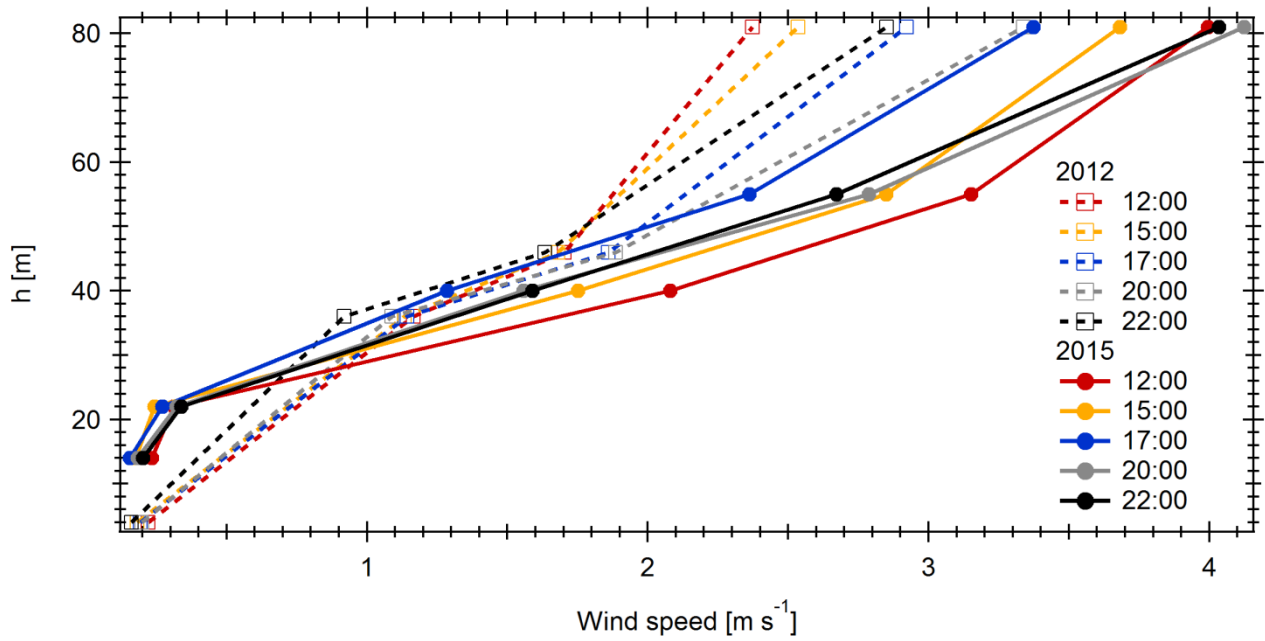

**Supplementary Figure 6.** Wind speed measured at different heights above ground level in November 2012 (dashed lines) and November 2015 (solid lines). Diel average values are shown for 12:00, 15:00, 17:00, 20:00 and 22:00 local time.

ATTO 2012/11/10

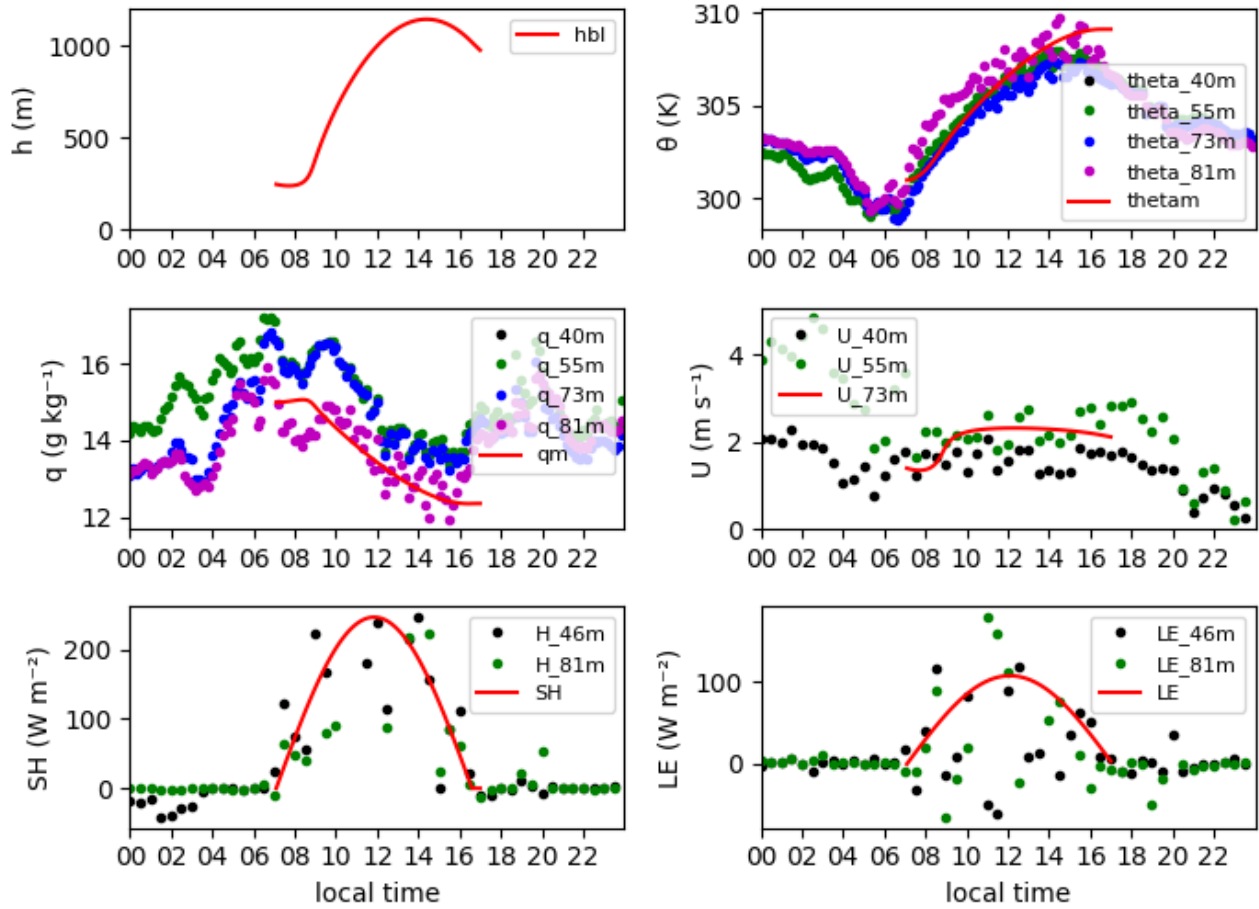

**Supplementary Figure 7.** Boundary layer case study for November 10, 2012. Red lines represent model results, points are measured data at various heights, as indicated. The panels show boundary layer height ( $h$ ), potential temperature ( $\theta$ ), specific humidity ( $q$ ), wind speed ( $U$ ), sensible heat flux ( $SH$ ) and latent heat flux ( $LE$ ), respectively.

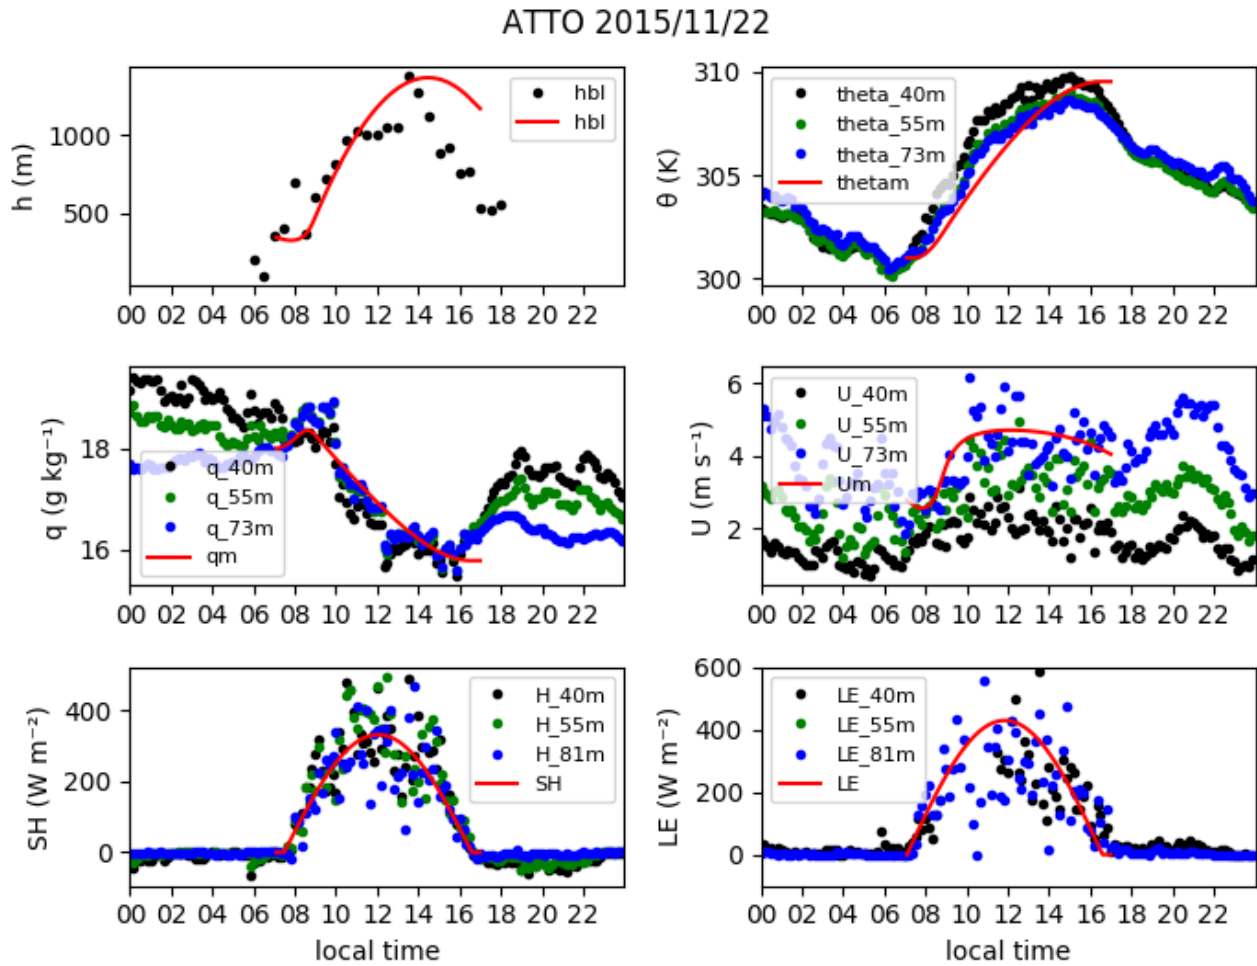

**Supplementary Figure 8.** Boundary layer case study for November 22, 2015. Red lines represent model results, points are measured data. The panels show boundary layer height ( $h$ ), potential temperature ( $\theta$ ), specific humidity ( $q$ ), wind speed ( $U$ ), sensible heat flux ( $\text{SH}$ ) and latent heat flux ( $\text{LE}$ ), respectively.



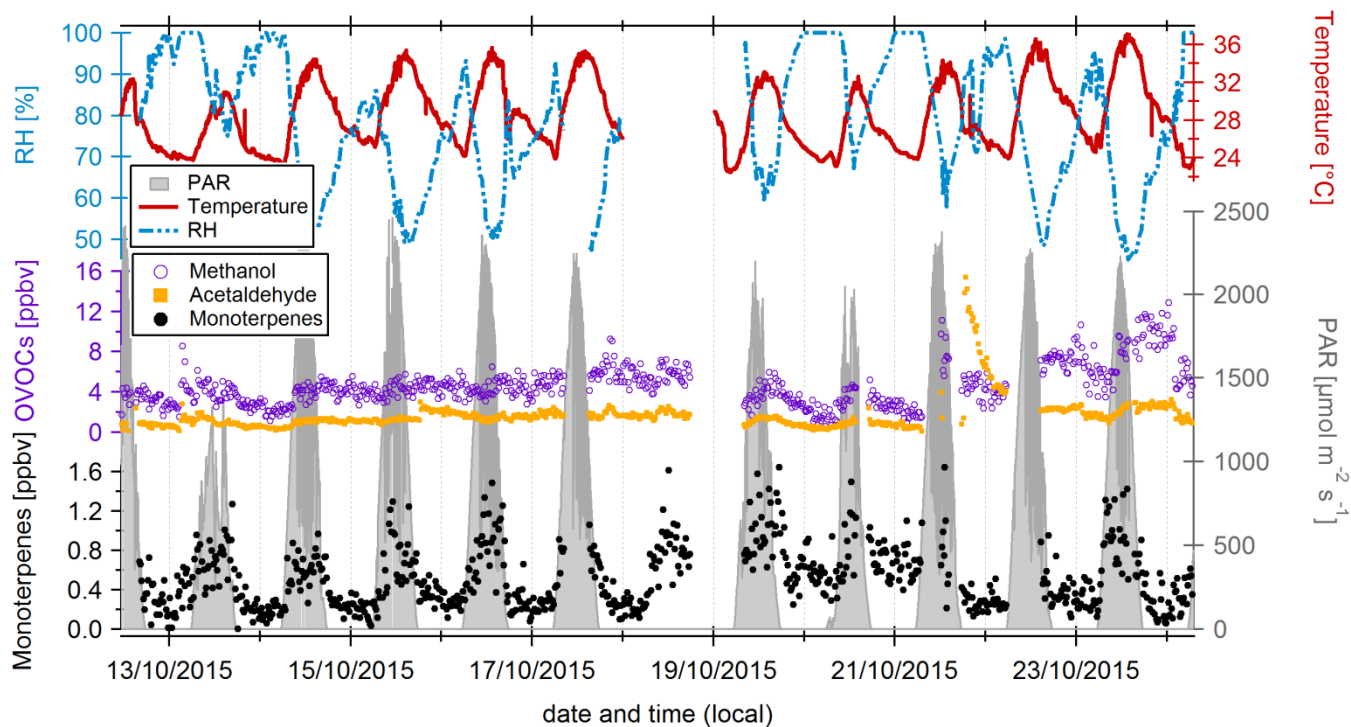

**Supplementary Figure 9.** Time series of VOC mixing ratios, photosynthetic active radiation, ambient relative humidity and temperature measured in October 2015 at 41 m above ground level.

**Supplementary Table 1.** Contributions of individually measured compounds to total OH reactivity. Reaction coefficients ( $k$ ) of single compounds with the OH radical, campaign averages for November 2015 measured at 38 m (CO, methane, ozone, NO, NO<sub>2</sub>) or 41 m (isoprene, MVK/ MACR/ ISOPOOH) and standard deviations thereof.

| <b>Compound</b>         | $k_{X+OH}$ [cm <sup>3</sup><br>molecule <sup>-1</sup> s <sup>-1</sup> ] | Average OH<br>reactivity [s <sup>-1</sup> ] | Standard deviation<br>[s <sup>-1</sup> ] |
|-------------------------|-------------------------------------------------------------------------|---------------------------------------------|------------------------------------------|
| <b>Isoprene</b>         | 1.0 x 10 <sup>-10</sup>                                                 | 9.12                                        | 5.15                                     |
| <b>MVK+MACR+ISOPOOH</b> | 5.62 x 10 <sup>-11</sup>                                                | 2.04                                        | 0.77                                     |
| <b>CO</b>               | 1.44 x 10 <sup>-13</sup>                                                | 0.48                                        | 0.14                                     |
| <b>Ozone</b>            | 7.3 x 10 <sup>-14</sup>                                                 | 0.03                                        | 0.01                                     |
| <b>Methane</b>          | 6.4 x 10 <sup>-15</sup>                                                 | 0.28                                        | 0.00                                     |
| <b>NO</b>               | 3.3 x 10 <sup>-11</sup>                                                 | 0.01                                        | 0.02                                     |
| <b>NO<sub>2</sub></b>   | 1.1 x 10 <sup>-11</sup>                                                 | 0.03                                        | 0.04                                     |
